# Supplementary material for: Facile patterning of amorphous indium oxide thin films based on a gel-like aqueous precursor for low-temperature, high performance thin-film transistors
Source: Royal Society of Chemistry journal article supplement (doi:10.1039/c5tc04107d), 2016-01-01
Supplement: c5tc04107d1.pdf [file c5tc04107d1.pdf]

## Supporting Information

### Facile patterning of amorphous indium oxide thin films based on gel-like aqueous precursor for low-temperature, high-performance thin-film transistors

Yuzhi Li, Linfeng Lan,\* Peng Xiao, Zhenguo Lin, Sheng Sun, Wei Song, Erlong Song, Peixiong Gao, Peng Zhang and Junbiao Peng\*

State Key Laboratory of Luminescent Materials and Devices, South China University of Technology, Guangzhou 510640, China. E-mail: lanlinfeng@scut.edu.cn, psjbpeng@scut.edu.cn

RMS roughness is defined as:

$$RMS = \sqrt{\frac{\sum_{i=1}^n (x_i - \bar{x})^2}{n}}$$

where  $x_i$  is surface height of every measured point,  $\bar{x}$  is average height, and  $n$  is the total number of measured points.

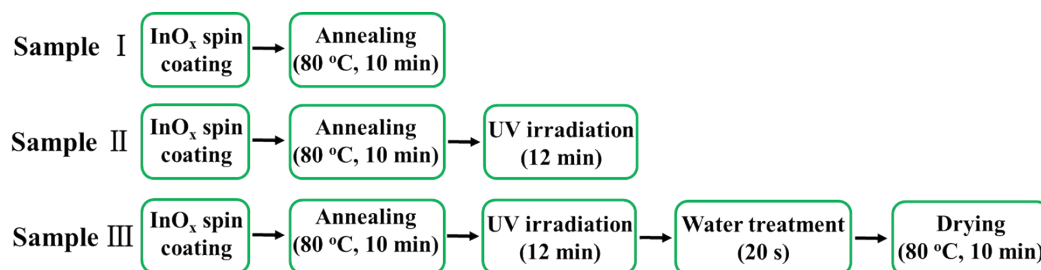

**Figure S1.** Preparation process-flow of samples.

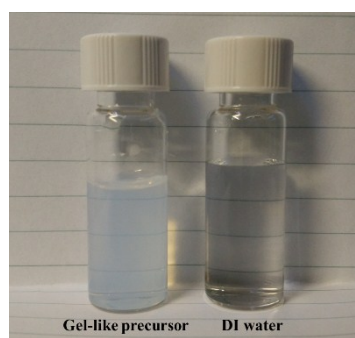

**Figure S2.** Optical image of gel-like aqueous precursor after filtering with 0.45 μm syringe filter.

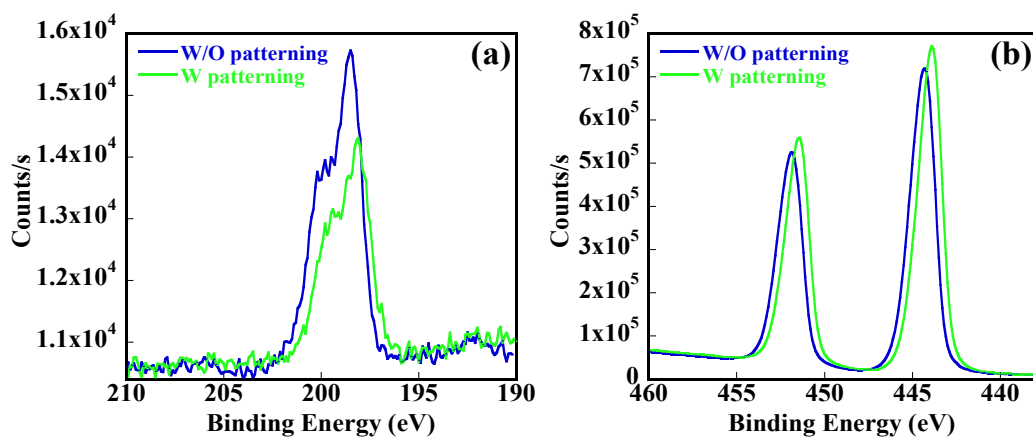

**Figure S3.** (a) Cl 2p and (b) In 3d XPS spectra collected from  $\text{InO}_x$  films annealed at 280 °C with and without UV irradiation and water treatment.

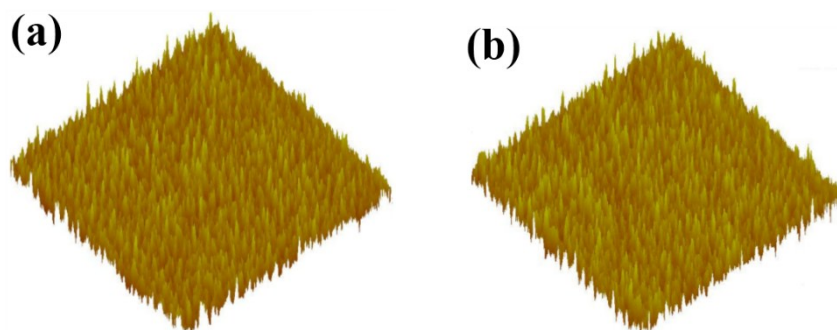

**Figure S4.** AFM images ( $5 \mu\text{m} \times 5 \mu\text{m}$ ) of  $\text{InO}_x$  film (a) with and (b) without UV irradiation and water treatment.

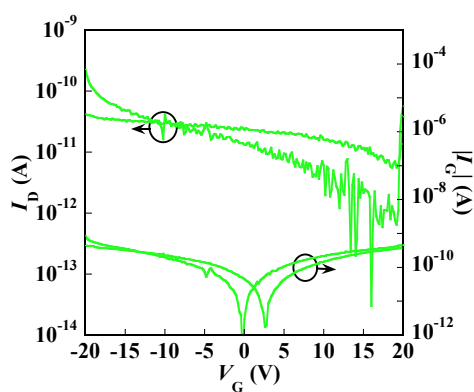

**Figure S5.** Transfer curves of  $\text{InO}_x$  TFT without UV irradiation and water treatment post-annealed at 180 °C.

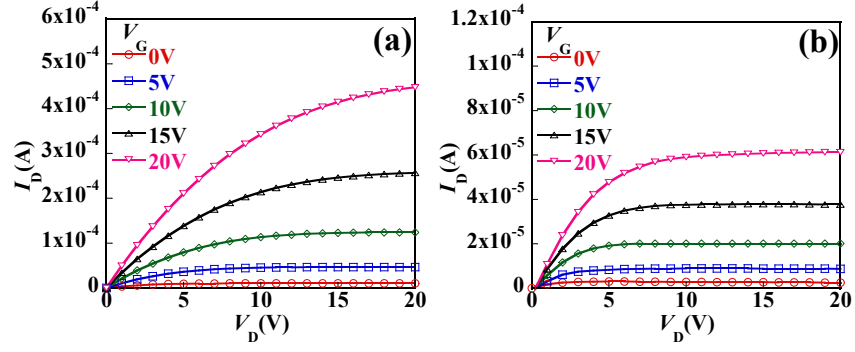

**Figure S6.** Output characteristics of InO<sub>x</sub> TFTs (a) with and (b) without patterning, both devices were post-annealed at 280 °C.

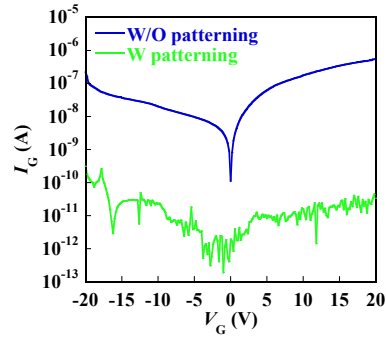

**Figure S7.** Gate leakage current ( $I_G$ ) of InO<sub>x</sub> TFTs with and without patterning, both devices were post-annealed at 280 °C.

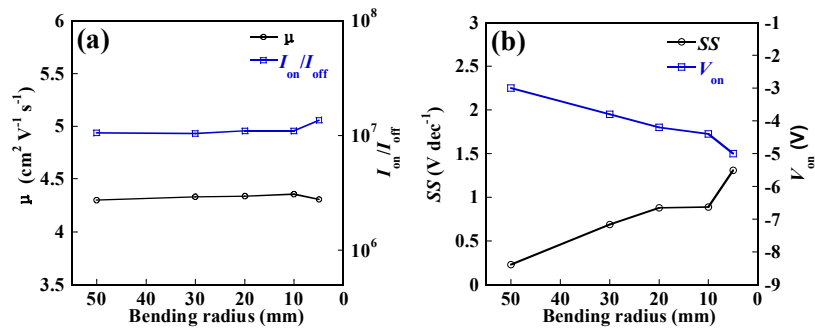

**Figure S8.** (a)  $\mu$  and  $I_{on}/I_{off}$ , (b)  $SS$  and  $V_{on}$  variations of InO<sub>x</sub> TFT with different bending radius.

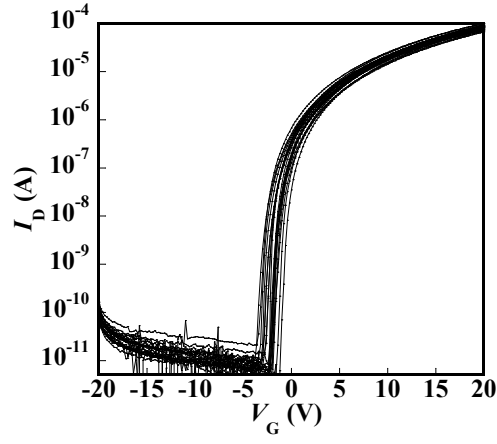

**Figure S9.** Transfer curves of 20 flexible InO<sub>x</sub> TFTs.

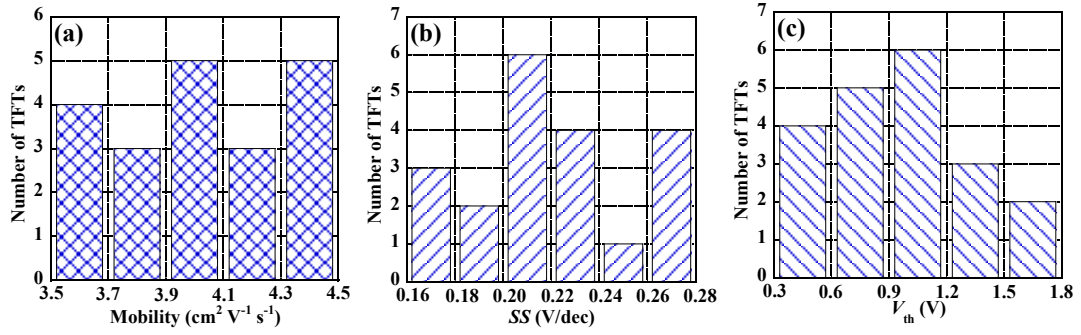

**Figure S10.** Statistical distributions of (a) mobilities, (b) subthreshold slopes, and (c) threshold voltages of 20 flexible InO<sub>x</sub> TFTs.

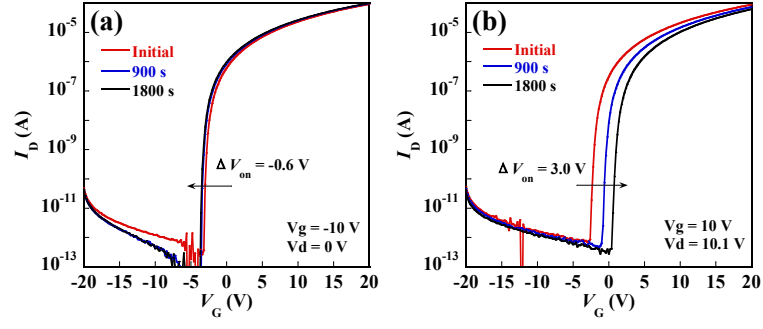

**Figure S11.** Variations of transfer curves under (a) negative and (b) positive gate bias stress.

Table S1. Comparison of this work to previous InO<sub>x</sub> TFTs annealed at 200 °C

|           | Precursor                         | Mobility<br>(cm <sup>2</sup> V <sup>-1</sup> s <sup>-1</sup> ) | SS (V/dec) | I <sub>on</sub> /I <sub>off</sub> | V <sub>th</sub> (V) |
|-----------|-----------------------------------|----------------------------------------------------------------|------------|-----------------------------------|---------------------|
| This work | InCl <sub>3</sub>                 | 3.3                                                            | 0.3        | 2.6 × 10 <sup>7</sup>             | 2.9                 |
| Ref. 16   | In(NO <sub>3</sub> ) <sub>3</sub> | 3.14                                                           | 0.16       | >10 <sup>9</sup>                  | ~0                  |
| Ref. 25   | In(NO <sub>3</sub> ) <sub>3</sub> | 0.03                                                           | -          | 2.2 × 10 <sup>4</sup>             | 1.5                 |
| Ref. 36   | In(NO <sub>3</sub> ) <sub>3</sub> | 1.83                                                           | 0.3        | ~10 <sup>8</sup>                  | -1.9                |
| Ref. 37   | In(NO <sub>3</sub> ) <sub>3</sub> | 1.44                                                           | -          | ~10 <sup>6</sup>                  | 9.6                 |
